# Supplementary material for: The Major Intrinsic Protein Family and Their Function Under Salt-Stress in Peanut
Source: Front Genet. 2021 Feb 24;12:639585. doi: 10.3389/fgene.2021.639585 (PMC7943621; doi:10.3389/fgene.2021.639585)
Supplement: Supplementary file 1 [file Table_1.XLSX]

## Sheet: Sheet1
Table 1 Characterization of aquapoporins in Arachis hypogaea
Subfamily	Gene name	Gene ID	Location	Start	End	Gene length(bp)	Transcript length(bp)	CDS length(bp)	Protein length(aa)	Protein pl
PIPs	AhPIP1:1	Arahy.BX8PA5.1	Chr.17	12176429	12178458	2030	1782	801	266	7.91
	AhPIP1:2	Arahy.A1MPI5.1	Chr.07	10162608	10165045	2438	1910	870	289	8.58
	AhPIP1:3	Arahy.742XN0.1	Chr.20	38844025	38847489	3465	1766	870	289	9.1
	AhPIP1:4	Arahy.1SN7TU.1	Chr.10	26028118	26032070	3953	1701	819	272	8.31
	AhPIP1:5	Arahy.LZ1547.4	Chr.05	41894733	41902097	7365	3694	864	287	9.32
	AhPIP1:6	Arahy.QZ950J.1	Chr.13	112553227	112554810	1584	1416	864	287	8.84
	AhPIP1:7	Arahy.18NJDF.1	Chr.03	109601208	109602787	1580	1412	864	287	8.86
	AhPIP2:1	Arahy.W31NC6.1	Chr.18	4380969	4383516	2548	1739	870	289	8.3
	AhPIP2:2	Arahy.5L02ZS.1	Chr.08	28585944	28588491	2548	1795	870	289	7.57
	AhPIP2:3	Arahy.1ZE71I.1	Chr.03	1699322	1702128	2807	1615	816	271	7.6
	AhPIP2:4	Arahy.5EYH1D.1	Chr.13	3487284	3489804	2521	1498	795	264	6.94
	AhPIP2:5	Arahy.R3EP5M.1	Chr.15	160273013	160277112	4100	1748	864	287	8.57
	AhPIP2:6	Arahy.7IIA7U.1	Chr.05	115211045	115222076	11032	996	891	296	8.83
	AhPIP2:7	Arahy.J0HSVP.1	Chr.19	146784664	146788128	3465	1914	864	287	8.82
	AhPIP2:8	Arahy.J8IJ4G.1	Chr.09	118751456	118754782	3327	1794	864	287	9.04
TIPs	AhTIP1:1	Arahy.PC0WKD.1	Chr.14	141670242	141671713	1472	729	729	242	4.44
	AhTIP1:2	Arahy.X1FCJ7.1	Chr.04	127234712	127236183	1472	729	729	242	4.44
	AhTIP1:3	Arahy.6FT4NE.1	Chr.19	152456077	152457656	1580	839	765	254	7.57
	AhTIP1:4	Arahy.RT3Y3R.1	Chr.09	115454026	115455489	1464	828	759	252	5.48
	AhTIP1:5	Arahy.LE80VX.1	Chr.18	3541582	3543489	1908	1468	759	252	6.63
	AhTIP1:6	Arahy.BP2DBN.1	Chr.08	27593906	27595730	1825	1567	906	301	9.94
	AhTIP1:7	Arahy.D3WR7Y.1	Chr.13	4403776	4408372	4597	3749	735	244	5.46
	AhTIP1:8	Arahy.D0WQQS.1	Chr.03	2629695	2631204	1510	1054	717	238	5.01
	AhTIP1:9	Arahy.E0VATA.1	Chr.06	48735427	48736788	1362	1254	753	250	6.22
	AhTIP1:10	Arahy.PA5VTH.1	Chr.16	57089723	57091380	1658	1542	753	250	6.22
	AhTIP2:1	Arahy.B5S055.1	Chr.15	15469663	15471461	1799	1112	747	248	4.64
	AhTIP2:2	Arahy.G4J84I.1	Chr.05	42390833	42392633	1801	1124	747	248	4.64
	AhTIP2:3	Arahy.E05UEM.1	Chr.18	1260696	1262525	1830	1150	747	248	6.5
	AhTIP2:4	Arahy.SK3TPA.1	Chr.07	79833912	79835738	1827	1150	747	248	6.5
	AhTIP2:5	Arahy.S70B5X.1	Chr.09	2904714	2906625	1912	747	747	248	4.98
	AhTIP2:6	Arahy.VGWE53.1	Chr.19	3758527	3760464	1938	708	708	235	4.98
	AhTIP3:1	Arahy.A12IF9.1	Chr.15	154960826	154963193	2368	1484	768	255	6.86
	AhTIP3:2	Arahy.NYRC7E.1	Chr.05	89949549	89952159	2611	1480	768	255	6.86
	AhTIP4:1	Arahy.H6S6U7.1	Chr.20	123676806	123679608	2803	1292	744	247	6.5
	AhTIP4:2	Arahy.49RQQB.1	Chr.10	100565058	100567906	2849	1290	744	247	6.29
	AhTIP4:3	Arahy.84FS6Z.1	Chr.20	123644938	123647154	2217	1323	744	247	6.6
	AhTIP4:4	Arahy.J4S87V.1	Chr.10	100482190	100484548	2359	1312	744	247	6.41
NIPs	AhNIP1:1	Arahy.W3BAYH.1	Chr.13	146281710	146285275	3566	1289	783	260	8.73
	AhNIP1:2	Arahy.54R7RK.1	Chr.03	143388131	143392738	4608	1220	708	235	8.98
	AhNIP1:3	Arahy.3NX5WZ.1	Chr.20	2972819	2974625	1807	1546	801	266	7.87
	AhNIP1:4	Arahy.L5GP6Q.1	Chr.03	143399751	143405151	5401	4052	837	278	9.48
	AhNIP1:5	Arahy.HS80UB.1	Chr.13	146291961	146294208	2248	1516	780	259	8.71
	AhNIP2:1	Arahy.93HJVC.1	Chr.14	137492598	137496773	4176	1436	855	284	6.96
	AhNIP2:2	Arahy.I967WA.1	Chr.04	123184718	123188476	3759	1459	858	285	7.66
	AhNIP3:1	Arahy.5VQF1X.1	Chr.03	7376469	7379142	2674	651	651	216	7.4
	AhNIP4:1	Arahy.19TYYE.1	Chr.17	15136732	15139014	2283	978	792	263	7.46
	AhNIP4:2	Arahy.C91XQ9.1	Chr.07	12488700	12490951	2252	1051	873	290	7.46
	AhNIP4:3	Arahy.FID74G.1	Chr.14	40391249	40396313	5065	1149	837	278	6.51
	AhNIP4:4	Arahy.NKS4EZ.1	Chr.04	52804002	52808189	4188	1151	837	278	7.03
	AhNIP5:1	Arahy.93RWPI.1	Chr.09	117327918	117338456	10539	1980	924	307	7.87
	AhNIP5:2	Arahy.UK0SNM.1	Chr.19	149408949	149419798	10850	2006	924	307	7.88
	AhNIP6:1	Arahy.TUB0KC.1	Chr.09	779483	784209	4727	1494	933	310	7.46
	AhNIP6:2	Arahy.350VGV.1	Chr.19	802205	807465	5261	1494	933	310	8.48
	AhNIP7:1	Arahy.4EA0CW.1	Chr.13	5668181	5680717	12537	978	978	325	8.19
SIPs	AhSIP1:1	Arahy.BS0ST2.1	Chr.20	141225124	141228838	3715	874	738	245	9.56
	AhSIP1:2	Arahy.QQ7287.1	Chr.10	114442376	114444956	2581	871	738	245	9.56
	AhSIP1:3	Arahy.I0HFQI.1	Chr.16	126780198	126783733	3536	1518	750	249	9.5
	AhSIP1:4	Arahy.K4UY0G.1	Chr.06	95557616	95561941	4326	1669	843	280	8.76
	AhSIP2:1	Arahy.B4HFY2.1	Chr.16	113343575	113345607	2033	1300	723	240	10.23
	AhSIP2:2	Arahy.MFRM64.1	Chr.06	85125338	85127364	2027	1285	723	240	10.37
XIPs	AhXIP1:1	Arahy.TZR4FL.1	Chr.13	10666108	10668098	1991	1248	729	242	8.88
	AhXIP1:2	Arahy.X885L6.1	Chr.03	7514114	7522656	8543	1196	879	292	9
	AhXIP2:1	Arahy.DAG01L.1	Chr.16	41014316	41019112	4797	1342	1074	357	7.69
	AhXIP2:2	Arahy.GLQM1M.1	Chr.06	30166873	30170415	3543	1535	1116	371	6.66
